# Supplementary material for: Dynamic SUMOylation of MORC2 orchestrates chromatin remodelling and DNA repair in response to DNA damage and drives chemoresistance in breast cancer
Source: PubMed Central journal article supplement (PMC9925317; doi:10.7150/thno.79688), 2023-01-22
Supplement: thnov13p0973s1.pdf [file thnov13p0973s1.pdf]

1 **Supporting Information for**

2

3 Zhang FL, et al. Dynamic SUMOylation of MORC2 orchestrates chromatin remodeling and DNA repair in  
4 response to DNA damage and drives chemoresistance in breast cancer

5

6 **This Supplementary Information includes**

7 Supplementary Figures S1 to S11

8 Supplementary Tables S1 to S4

9

10

11

12

13

14

15

16

17

18

19

20

21

22

23

24

25

26

27 **Supplementary figures and figure legends**

28

29

30

31

32

33

34

35

36

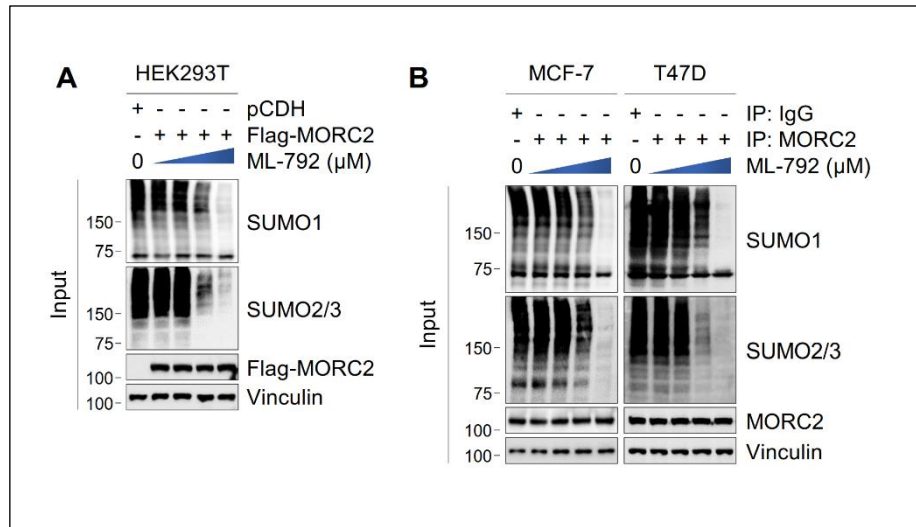

37 **Figure S1. ML-792 efficiently inhibits MORC2 SUMOylation**

38 (A-B) HEK293T (A), MCF-7, and T47D (B) cells were treated with increasing doses of SUMO inhibitor  
39 ML-792 (0, 0.01, 0.1 and 1 μM), and subjected to immunoblotting analysis with the indicated antibodies.

40

41

42

43

44

45

46

47

48

49

50

51

52

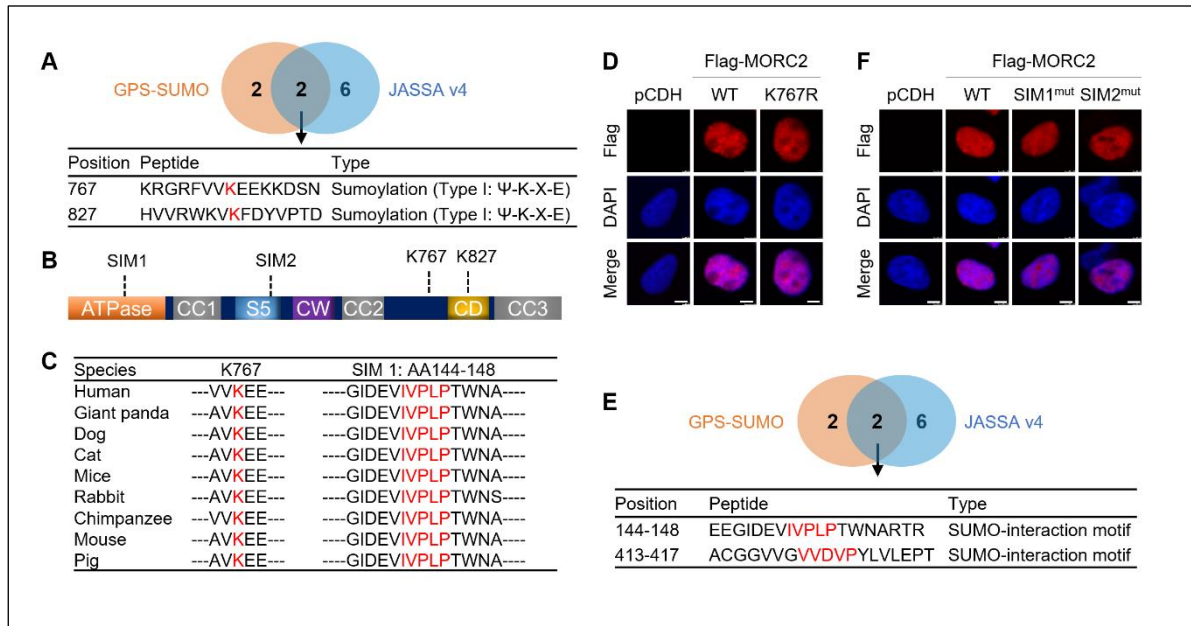

**Figure S2. Prediction of SUMO modification site and SUMO-interaction motif**

(A-B) Both GPS-SUMO and JASSA programs were used to predict SUMO modification sites of MORC2. Both K767 and K827 are potential SUMOylation sites of MORC2 (A), and their locations within MORC2 are shown in B.

(C) Alignment of MORC2 SUMO modification site K767 and SUMO-interaction motif SIM1 across different species.

(D) Subcellular localization of WT and K767R Flag-MORC2 were analyzed by immunofluorescent staining with an anti-Flag antibody in HEK293T cells. Nuclei were counterstained with DAPI. Scale bar: 2.5µm.

(E) GPS-SUMO and JASSA programs were used to predict SUMO-interaction motif of MORC2. Two potential SIMs (residues 144-148 and 413-417) were identified (E), and their locations within MORC2 are shown in B.

(F) Subcellular localization of WT and two SIM mutant Flag-MORC2 were analyzed by immunofluorescent staining. Nuclei were counterstained with DAPI. Scale bar: 2.5µm.

79  
80  
81  
82  
83  
84  
85  
86  
87  
88  
89  
90  
91  
92  
93  
94  
95

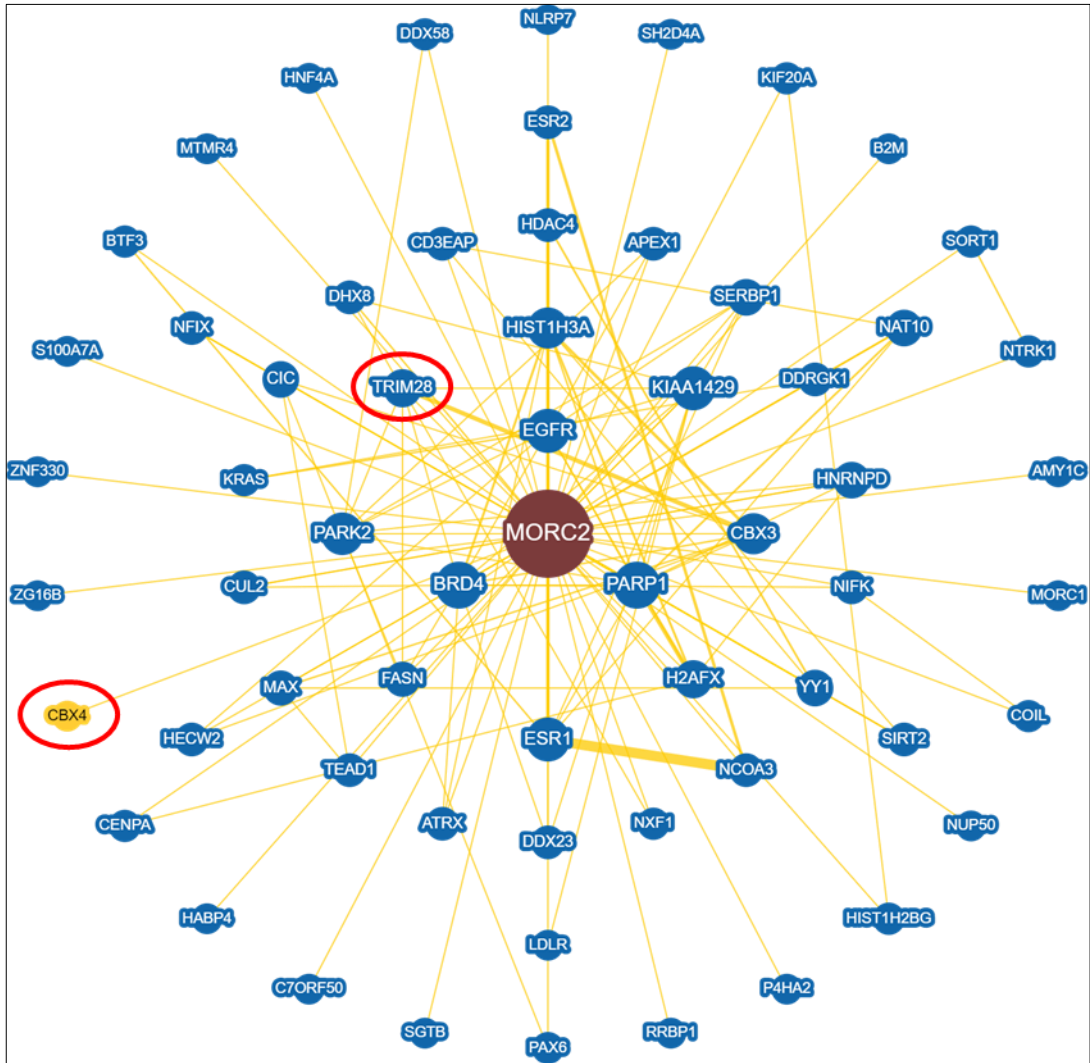

96 **Figure S3. MORC2-interacting proteins in database BioGRID (<https://thebiogrid.org>).**  
97 Two putative SUMO E3 ligases, TRIM28 and CBX4, were found as the potential binding partners of human  
98 MORC2 as indicated by red circles.

99  
100  
101  
102  
103  
104

105  
 106  
 107  
 108  
 109  
 110  
 111  
 112  
 113  
 114  
 115  
 116  
 117  
 118  
 119  
 120  
 121  
 122  
 123  
 124  
 125  
 126  
 127  
 128  
 129  
 130

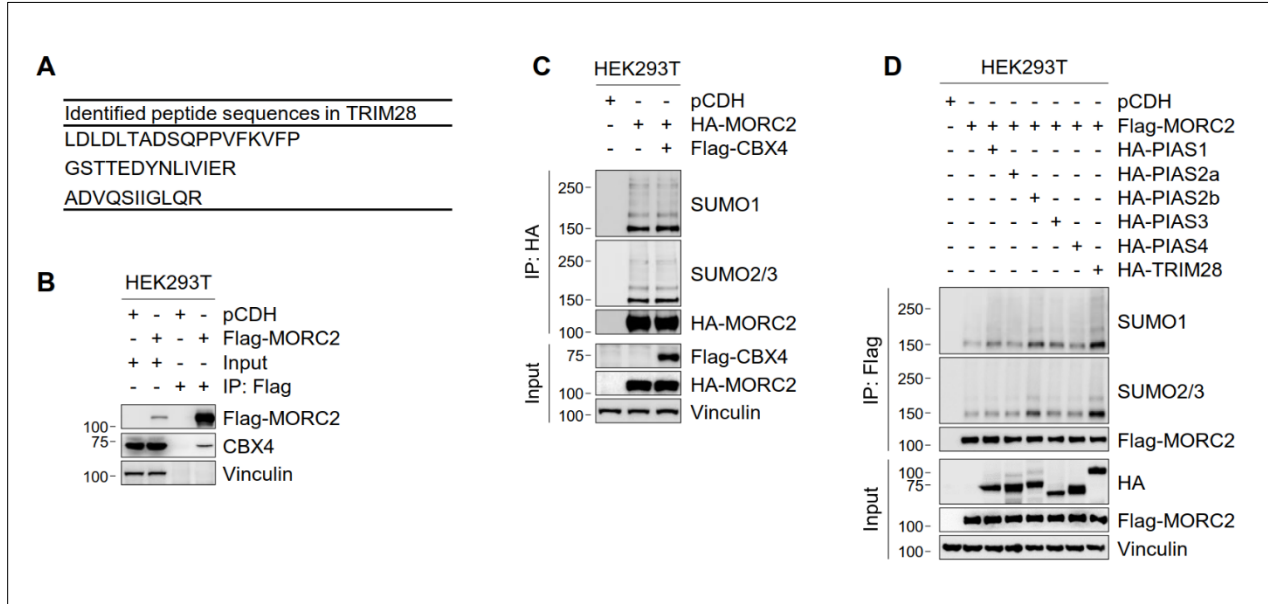

**Figure S4. Screening of SUMO E3 ligases for MORC2 SUMOylation**

(A) Identified sequences of TRIM28 peptides by mass spectrometry analysis of MORC2 interactome in our previous study.

(B) Flag-MORC2 was ectopically expressed in HEK293T cells, and total cellular lysates were subjected to Co-IP assays with Flag beads, followed by immunoblotting analysis with the indicated antibodies.

(C) HEK293T cells were transfected with the indicated plasmids. After 48 h of transfection, total cellular lysates were subjected to Co-IP assays with HA-beads, followed by immunoblotting analysis with the indicated antibodies.

(D) HEK293T cells were transiently transfected with Flag-MORC2 together with HA-PIAS1, HA-PIAS2a, HA-PIAS2b, HA-PIAS3, HA-PIAS4 or HA-TRIM28. After 48 h of transfection, cells were lysed, and Flag-MORC2 protein was pulled down using Flag-beads, followed by immunoblotting analysis with the indicated antibodies.

131  
 132  
 133  
 134  
 135  
 136  
 137  
 138  
 139  
 140  
 141  
 142  
 143  
 144  
 145  
 146  
 147  
 148  
 149  
 150  
 151  
 152  
 153  
 154  
 155  
 156

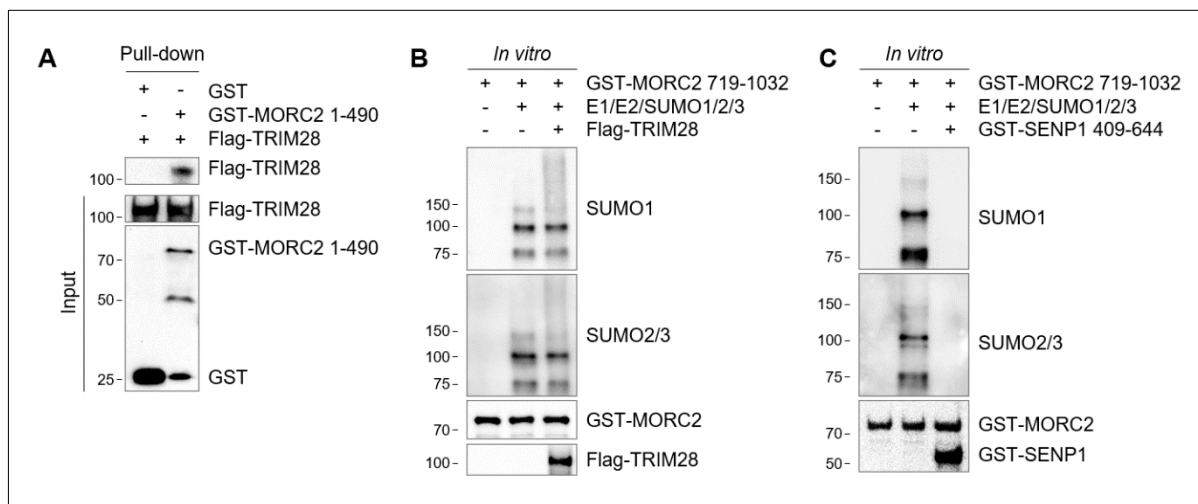

**Figure S5. MORC2 SUMOylation is controlled by TRIM28 and SENP1 *in vitro***

(A) GST pull-down assays were performed using purified GST-MORC2 fragment (residues 1-490) and recombinant Flag-TRIM28. Pull down samples were subjected to immunoblotting with the indicated antibodies. GST was used as negative control.

(B) TRIM28 directly promotes the *in vitro* SUMOylation of purified GST-MORC2 fragment (residues 719-1032). *In vitro* GST-MORC2 fragment SUMOylation was enhanced in the presence of recombinant human Flag-TRIM28.

(C) SENP1 directly blocks the *in vitro* SUMOylation of purified GST-MORC2 fragment (residues 719-1032). SUMOylation of GST-MORC2 fragment was blocked when the purified active SENP1 protein fragment (residues 409-644) was added.

157  
158  
159  
160  
161  
162  
163  
164  
165  
166  
167  
168  
169  
170  
171  
172  
173

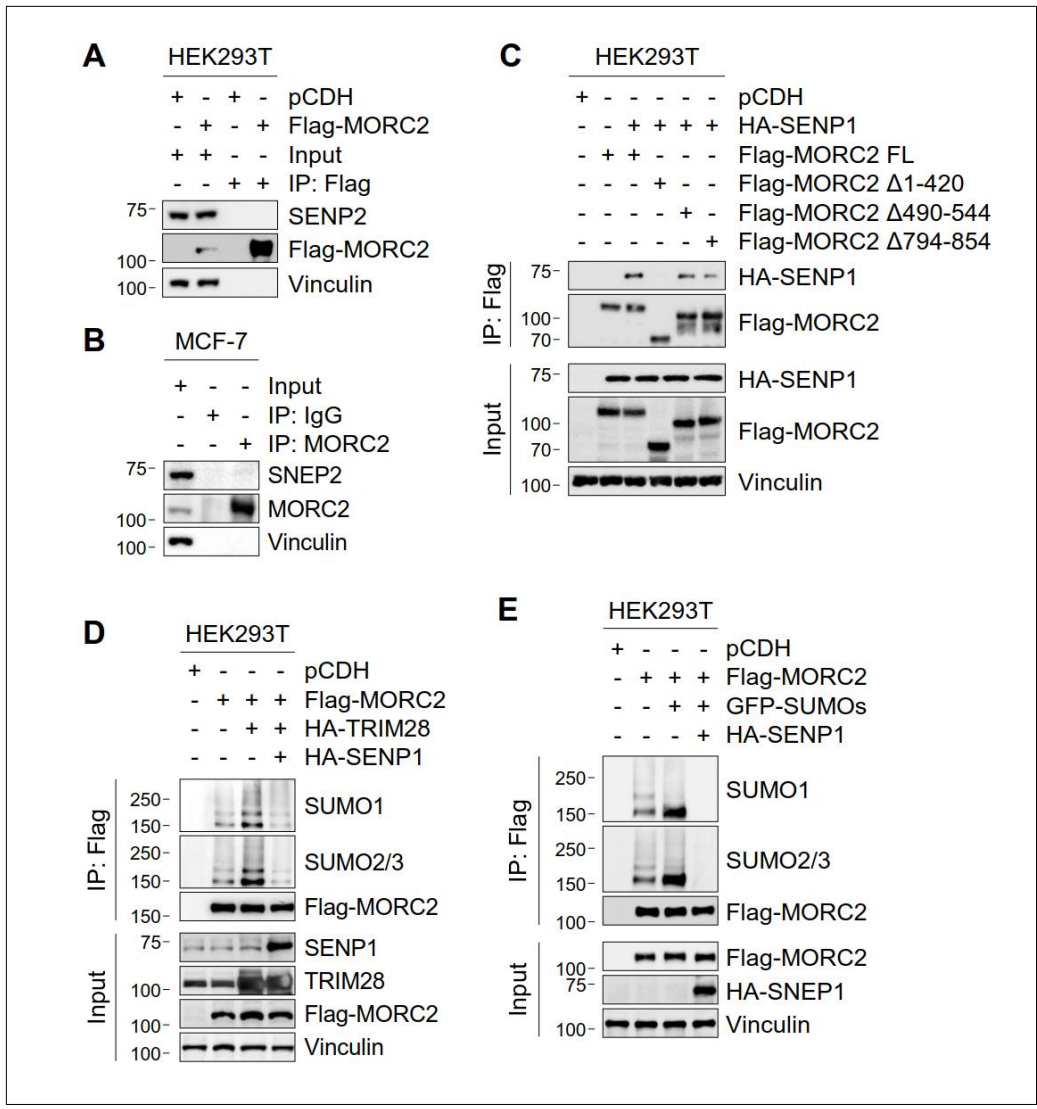

**Figure S6. identification of deSUMOylating enzymes for MORC2**

(A) HEK293T cells ectopically expressing Flag-MORC2 were subjected to Co-IP assays, followed by immunoblotting to detect the interaction between MORC2 and SENP2.

(B) MCF-7 cells were processed for Co-IP assays using an anti-MORC2 antibody, followed by immunoblotting with the indicated antibodies.

(C) HEK293T were transfected the indicated expression vectors, and subjected to the sequential IP and immunoblotting analyses with the indicated antibodies.

(D) HEK293T cells were transfected with Flag-MORC2, HA-TRIM28 and with or without HA-SENP1, and cell lysates were extracted and pulled down using anti-Flag beads followed by immunoblotting to detect

183 MORC2 SUMOylation levels.

184 (E) HEK293T cells were transfected with Flag-MORC2, GFP-SUMOs plasmid mix with or without HA-  
185 SENP1, and cell lysates were subjected IP and immunoblotting assays with the indicated antibodies.

186

187

188

189

190

191

192

193

194

195

196

197

198

199

200

201

202

203

204

205

206

207

208



209  
210  
211  
212  
213  
214  
215  
216  
217  
218  
219  
220  
221  
222  
223  
224

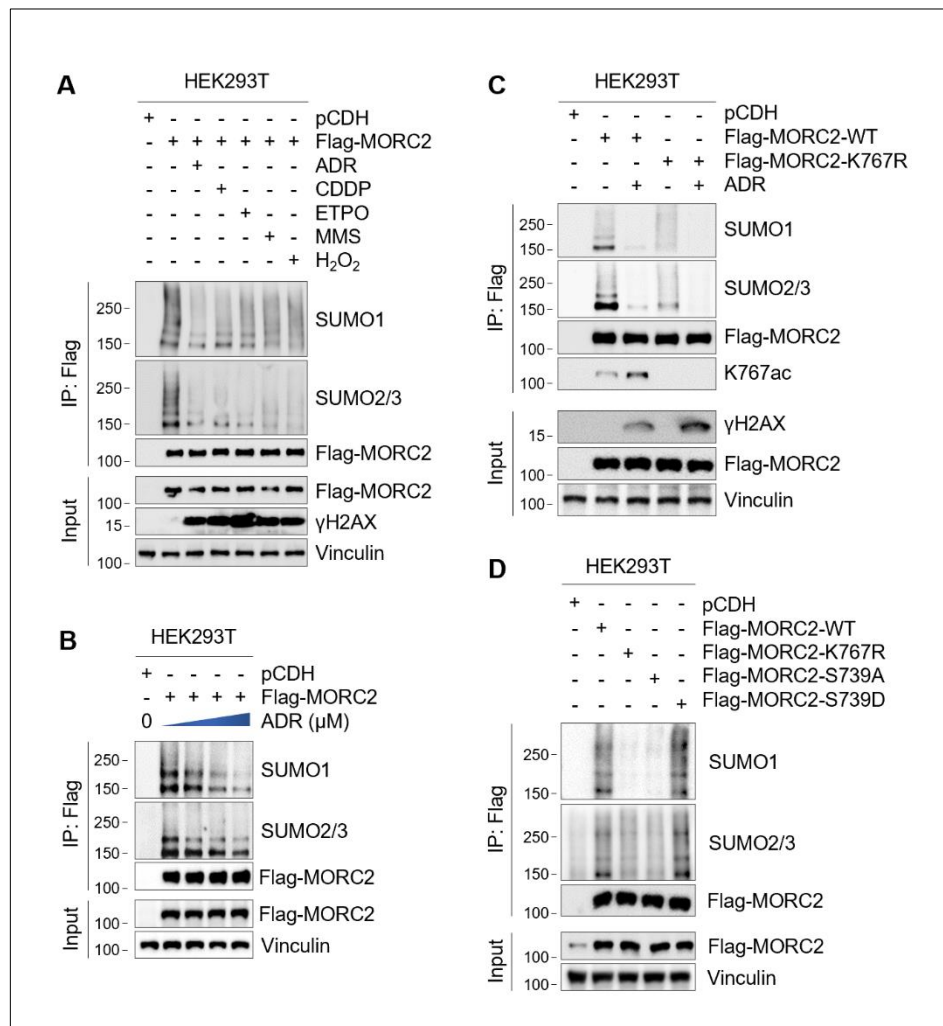

225 **Figure S7. Transient MORC2 deSUMOylation in response to genotoxic stress**

226 (A) HEK293T cells were transfected with Flag-MORC2 for 48 h and then treated with or without 1 μM ADR,  
227 100 μM CDDP, 20 mM ETPO, 1 mM MMS, 1 mM H<sub>2</sub>O<sub>2</sub> for 2 h. Cell lysates were processed for Co-IP  
228 assays using anti-Flag beads, followed by immunoblotting to detect the SUMOylation levels of MORC2.

229 (B) HEK293T cells were transfected with Flag-MORC2 for 48 h and then treated with or without increasing  
230 doses of ADR (0, 0.01, 0.1 and 1 μM) for 2 h. Cell lysates were processed for Co-IP assays using anti-Flag  
231 beads, followed by immunoblotting to detect the SUMOylation levels of MORC2.

232 (C) HEK293T cells were transfected with WT or K767R Flag-MORC2 for 48 h, and then treated with or  
233 without 1 μM ADR for 2 h. Cell lysates were processed for Co-IP assays using anti-Flag beads, followed by  
234 immunoblotting analyses with the indicated antibodies.

235 (D) HEK293T cells were transfected with Flag-MORC2 (WT, K767R, S739A or S739D) for 48 h. Total cell  
236 lysates were harvested for IP assays using anti-Flag beads, followed by immunoblotting with the indicated  
237 antibodies.

238

239

240

241

242

243

244

245

246

247

248

249

250

251

252

253

254

255

256

257

258

259

260

261  
262  
263  
264  
265  
266  
267  
268  
269  
270  
271  
272  
273  
274  
275  
276  
277  
278  
279  
280  
281  
282  
283  
284  
285  
286

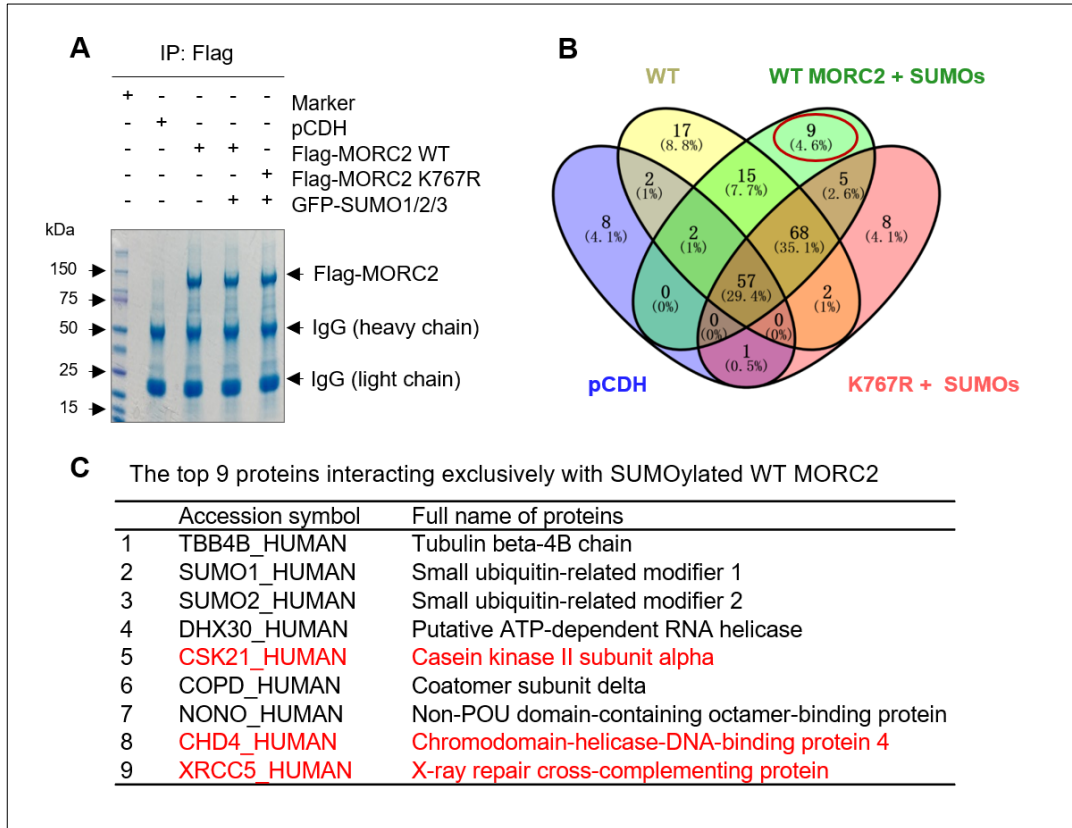

**Figure S8. Analysis of binding proteins of SUMOylated MORC2**

(A) HEK293T cells stably expressing control vector pCDH, WT and K767R Flag-MOTRC2 alone in combination with or without GFP-SUMO1/2/3 were subjected to Co-IP assays using anti-Flag beads followed by SDS-PAGE and Coomassie brilliant blue staining.

(B) Interacting proteins of Flag-MORC2 were identified using LC-MS/MS analysis, and the numbers of specific interacting proteins of each group are shown in Venn diagram.

(C) The nine proteins which were marked in B using red circle were exclusively identified in the SUMOylated MORC2 group. Proteins associated with DNA damage are highlighted in red.

287  
 288  
 289  
 290  
 291  
 292  
 293  
 294  
 295  
 296  
 297  
 298  
 299  
 300  
 301  
 302  
 303  
 304  
 305  
 306  
 307  
 308  
 309  
 310  
 311  
 312

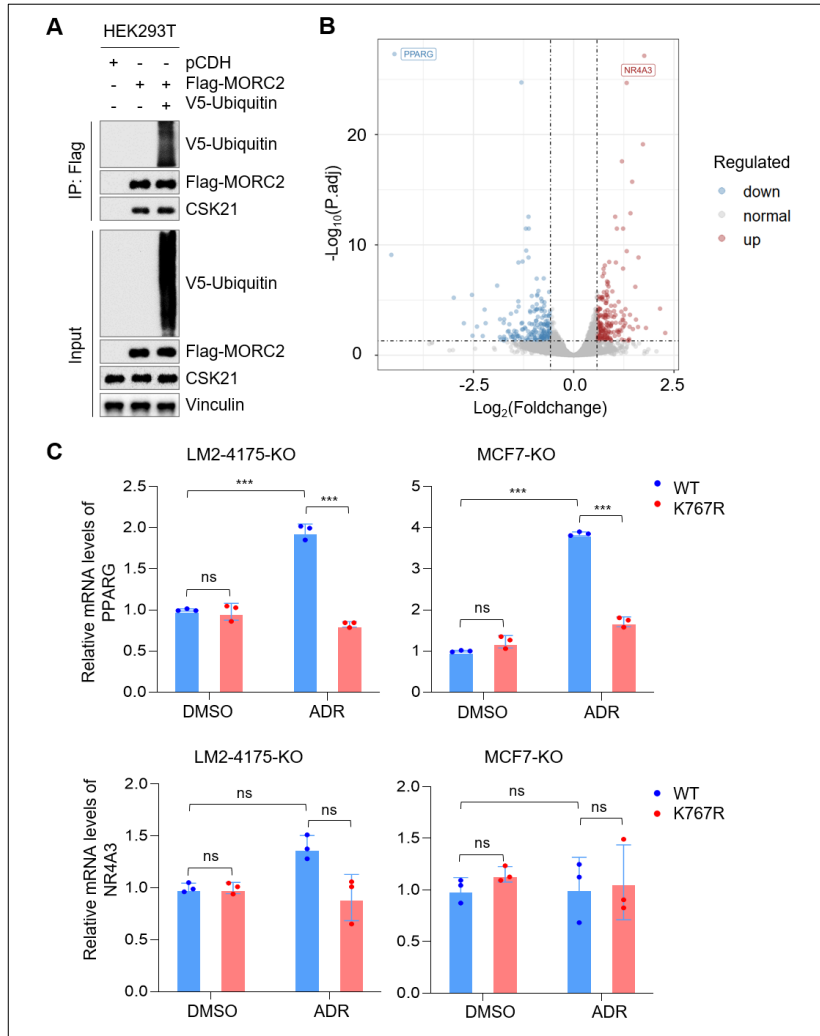

**Figure S9. Analysis of binding proteins of SUMOylated MORC2**

(A) HEK293T cells expressing control vector and Flag-MORC2 in combination with or without V5-ubiquitin for 48 h were subjected to Co-IP assays with anti-Flag beads, followed by immunoblotting analysis.

(B) RNA-seq data from the GEO database GSE95452 was reanalyzed. Differentially expressed genes between wild-type and MORC2 KO HeLa cells were displayed using volcano plot, and the DNA damage associated genes PPARG and NR4A3 are shown.

(C) The mRNA level for PPARG, but not NR4A3, was significantly higher in MCF7 and LM2-4175 cells expressing WT-MORC2 compared to K767R-MORC2, after treatment with ADR.

313  
314  
315  
316  
317  
318  
319  
320  
321  
322  
323  
324  
325  
326  
327  
328  
329  
330  
331  
332  
333  
334  
335  
336  
337  
338

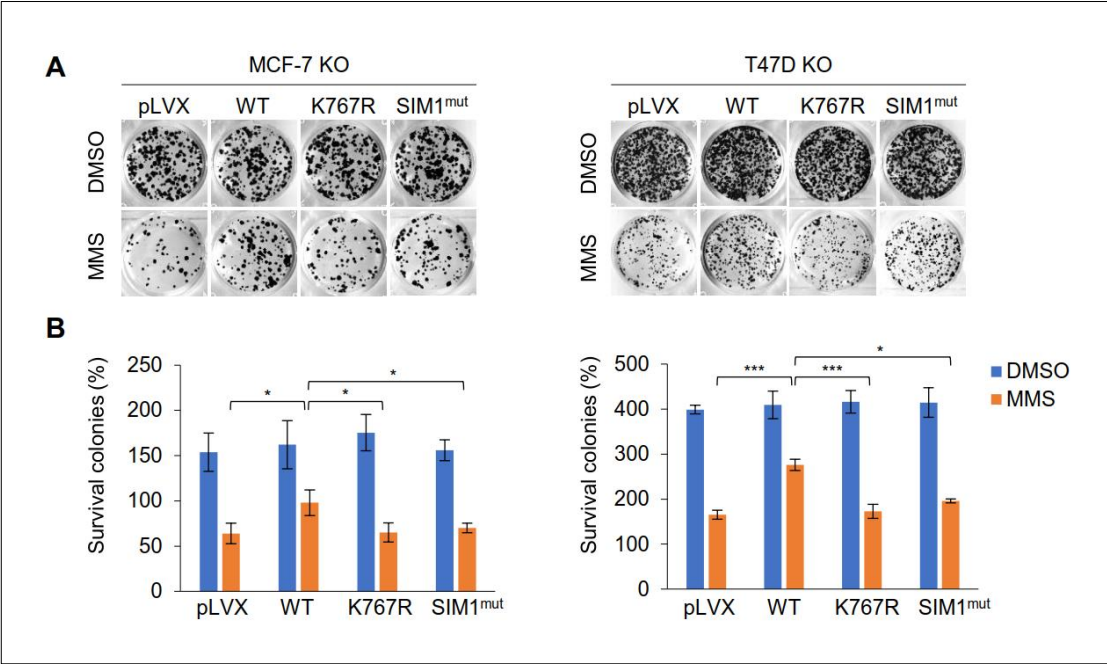

**Figure S10. SUMOylated MORC2 renders breast cancer cells resistant to DNA damage agent MMS**

(A-B) WT, K767R and SIM1<sup>mut</sup> MORC2 were reconstituted into MORC2-knockout MCF-7 and T47D cells. Cells were treated with 200 nM DNA damage agent MMS for approximately 14 days. The representative images of survival colonies are shown in A. Corresponding quantitative results (B) are represented as mean  $\pm$  S.D. as indicated (n=3).

339  
340  
341  
342  
343  
344  
345  
346  
347  
348  
349

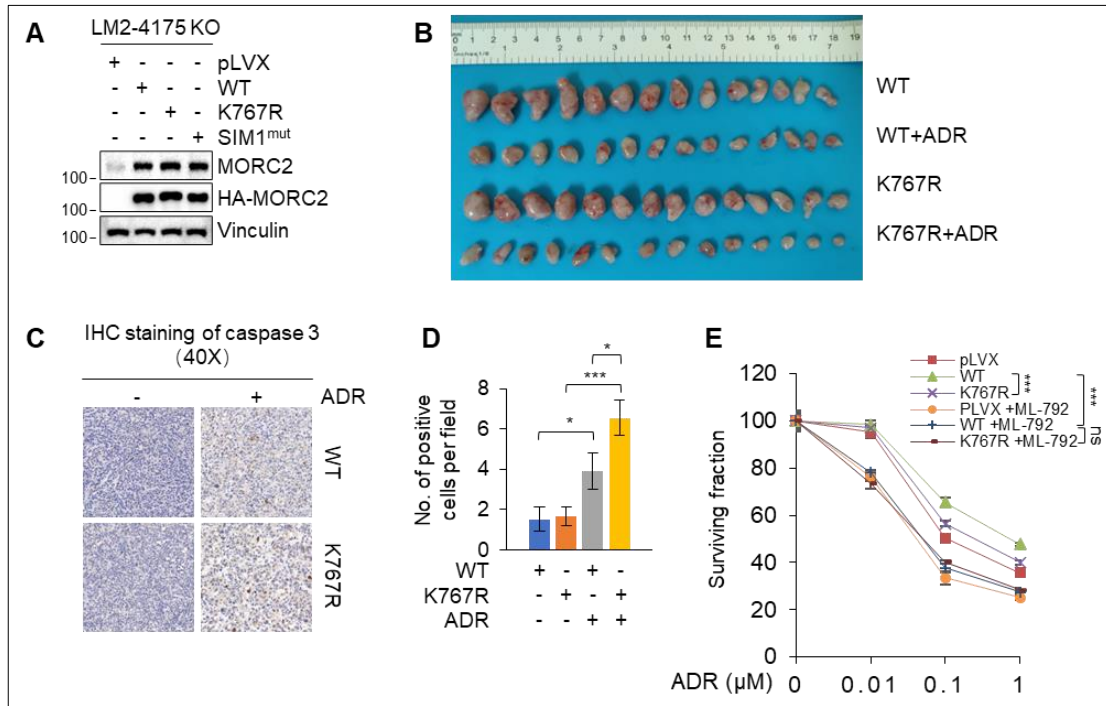

350  
351  
352  
353  
354  
355  
356  
357  
358  
359  
360  
361  
362  
363

**Figure S11. MORC2 SUMOylation renders breast cancer cells resistant to genotoxic drug ADR**

(A) MORC2-knockout LM2-4175 cells were reconstituted with WT, K767R and SIM1<sup>mut</sup> HA-MORC2 through lentiviral infection and expression status were detected by Western blotting.

(B) The resultant LM2-4175 cells were injected into the subcutaneous flanks of female nude mice to establish xenograft tumors (n=14/group). ADR treatment was started when the tumor volume in one of the groups exceeded 100 mm<sup>3</sup>. Representative images of xenograft tumors are shown.

(C-D) Representative images of IHC staining of cleaved-caspase 3. Corresponding quantitative results are shown in D.

(E) MCF-7 cells stably expressing control vector, WT or K767R MORC2 were treated with increasing doses of ADR alone or in combination with or without 0.5  $\mu$ M ML-792, followed by CCK-8 assays. Quantitative results are represented as mean  $\pm$  S.D. as indicated (n=3)

## Supplementary Tables

**Table S1. Primers used for subcloning to other vectors**

| <b>Genes</b> | <b>Primers</b> | <b>Sequences</b>                                                         |
|--------------|----------------|--------------------------------------------------------------------------|
| HA-MORC2     | Forward        | TTCCTCGAGACTAGTTCTGCCACCATGGCTTTCACAAA<br>TTAC                           |
|              | Reverse        | GGATCCGCGGCCGCTCTTTAAGCGTAGTCTGGGACGT<br>CGTATGGGTAGTCCCCCTTGGTGATGA     |
| HA-SEN1      | Forward        | AGAGGATCTATTTCCGGTGCCACCATGGATGATATTGC<br>TGATAGG                        |
|              | Reverse        | GGCGGGATCCGCGGCCGCTTAAGCGTAGTCTGGGACG<br>TCGTATGGGTACAAGAGTTTTCCGGTGGAGG |
| HA-SEN2      | Forward        | ACCTCCATAGAAGATTCTAGAGCCACCATGTACAGAT<br>GGCTG                           |
|              | Reverse        | GATCCATTTAAATTCGAATTCTTAAGCGTAGTCTGGGA<br>CGTCGTATGGGTA CAGCAACTGCTGATG  |
| HA-SEN3      | Forward        | ACCTCCATAGAAGATTCTAGAGCCACCATGAAAGAGA<br>CTATA                           |
|              | Reverse        | GATCCATTTAAATTCGAATTCTTAAGCGTAGTCTGGGA<br>CGTCGTATGGGTA CACAGTGAGTTTGCA  |
| HA-CBX4      | Forward        | GGATCTATTTCCGGTGAAGCCACCATGGAGCTGCCAG<br>CTGTTG                          |
|              | Reverse        | GGATCCGCGGCCGCTCTTTAAGCGTAGTCTGGGACGT<br>CGTATGGGTACACCGTCACGTA CTCTTG   |
| HA-UBC9      | Forward        | AGAGGATCTATTTCCGGTGCCACCATGTCCGGGGATCG<br>CCCTC                          |
|              | Reverse        | GGCGGGATCCGCGGCCGCTTAAGCGTAGTCTGGGACG<br>TCGTATGGGTATGAGGGCGCAA CTCTT    |
| HA-TRIM28    | Forward        | AGAGGATCTATTTCCGGTGCCACCATGGCGGCCTCCG<br>CGGCG                           |
|              | Reverse        | GGCGGGATCCGCGGCCGCTTAAGCGTAGTCTGGGACGT<br>CGTATGGGTAGGGGCCATCACCAGGGCC   |

**Table S2. Primers used for cloning sgRNA and shRNA**

| <b>Genes</b> | <b>Primers</b> | <b>Sequences</b>                                               |
|--------------|----------------|----------------------------------------------------------------|
| sgUBC9 #1    | Forward        | CACCGACATTCGGGTGAAATAATGG                                      |
|              | Reverse        | AAACCCATTATTTACCCGAATGTC                                       |
| sgUBC9 #2    | Forward        | CACCGTATTTCCCCACAGACTCCGT                                      |
|              | Reverse        | AAACACGGAGTCTGTGGGGAAATAC                                      |
| sgSENP1 #1   | Forward        | CACCGGCCACAAACAGGTTTTCCAG                                      |
|              | Reverse        | AAACCTGGAAAACCTGTTTGTGGCC                                      |
| sgSENP1 #2   | Forward        | CACCGTGAGCCCCAAGAAAACCTCAG                                     |
|              | Reverse        | AAACCTGAGTTTTCTTGGGGCTCAC                                      |
| shTRIM28 #1  | Forward        | CCGGCCTGGCTCTGTTCTCTGTCCTCTCGAGAGGACAG<br>AGAACAGAGCCAGGTTTTTG |
|              | Reverse        | AATTCAAAAACCTGGCTCTGTTCTCTGTCCTCTCGAG<br>AGGACAGAGAACAGAGCCAGG |
| shTRIM28 #2  | Forward        | CCGGGAGGACTACAACCTTATTGTTCTCGAGAACAAT<br>AAGGTTGTAGTCCTCTTTTTG |
|              | Reverse        | AATTCAAAAAGAGGACTACAACCTTATTGTTCTCGAG<br>ACAATAAGGTTGTAGTCCTC  |



**Table S3. Primers used for mutation cloning and qPCR**

| <b>Genes</b>              | <b>Primers</b> | <b>Sequences</b>                                                     |
|---------------------------|----------------|----------------------------------------------------------------------|
| MORC2-K767R               | Forward        | GCAGATTTGTTGTGAGGGAGGAAAAGAAGG                                       |
|                           | Reverse        | CCTTCTTTTCCTCCCTCACAACAAATCTGC                                       |
| MORC2-K827R               | Forward        | CGGTGGAAGGTGAGGTTTGACTACGTG                                          |
|                           | Reverse        | CACGTAGTCAAACCTCACCTTCCACCG                                          |
| MORC2-SIM1 <sup>mut</sup> | Forward        | AAGAAGGCATTGATGAAGTGGCAGCACCCGCGCCCAC<br>CTGGAATGCTCGG               |
|                           | Reverse        | CCGAGCATTCCAGGTGGGCGCGGGTGTGCCACTTCA<br>TCAATGCCTTCTT                |
| MORC2-SIM2 <sup>mut</sup> | Forward        | GGTTGTTGGGGCCCGCCGACGCCCCCTACCTGGTCCTGG<br>AGCCTACACACAACAA          |
|                           | Reverse        | TTGTTGTGTGTAGGCTCCAGGACCAGGTAGGGGGCGT<br>CGGCGGCCCAACAACC            |
| SENP1-C603S               | Forward        | ATGGAAGTGACAGCGGGATGTTTGC                                            |
|                           | Reverse        | GAAACATCCCGCTGTCACCTTCCAT                                            |
| TRIM28-C651A              | Forward        | AGTGTGAGTTTTGTTTCCACCTGGACGCCACCTGCCG<br>GC                          |
|                           | Reverse        | GCCGGCAGGTGGGCGTCCAGGTGGAAACAAAACCTCAC<br>ACT                        |
| MORC2 1-490               | Forward        | AGAGGATCTATTTCCGGTGCCACCATGGCTTTCACAAA<br>TTACAGC                    |
|                           | Reverse        | GGCGGGATCCGCGGCCGCTTACTTATCGTCGTCATCCT<br>TGTAATCAGCTCTCCGGCGTTTGTA  |
| MORC2 491-718             | Forward        | AGAGGATCTATTTCCGGTGCCACCATGGCTATGGAAA<br>TCCCCACC                    |
|                           | Reverse        | GGCGGGATCCGCGGCCGCTTACTTATCGTCGTCATCCT<br>TGTAATCTGGAGTCTTGATGACTTTG |
| MORC2 791-1032            | Forward        | AGAGGATCTATTTCCGGTGCCACCATGGTGGTGAAGA<br>AGACAGAG                    |
|                           | Reverse        | GGCGGGATCCGCGGCCGCTTACTTATCGTCGTCATCCT<br>TGTAATCGTCCCCCTTGGTGATGAG  |
| PPARG qPCR                | Forward        | GGGATCAGCTCCGTGGATCT                                                 |
|                           | Reverse        | TGCACTTTGGTACTCTTGAAGTT                                              |
| NR4A3 qPCR                | Forward        | TGCGTCCAAGCCCAATATAGC                                                |
|                           | Reverse        | GGTGTATTCCGAGCTGTATGTCT                                              |

**Table S4. Information for primary antibodies used in this study**

| Antibodies       | Vendors  | Cat#     | Species           | WB | IHC | IP | IF |
|------------------|----------|----------|-------------------|----|-----|----|----|
| SUMO1            | Abcam    | ab32058  | Rabbit monoclonal | √  | √   | √  | √  |
| SUMO2/3          | Abcam    | ab81371  | Mouse monoclonal  | √  | √   | √  | √  |
| MORC2            | Bethyl   | A300-149 | Rabbit polyclonal | √  |     | √  |    |
| Vinculin         | Sigma    | V9131    | Mouse monoclonal  | √  |     |    |    |
| Flag             | Sigma    | F3165    | Mouse monoclonal  | √  |     | √  |    |
| GFP              | Abcam    | ab32146  | Rabbit monoclonal | √  |     |    |    |
| HA               | CST      | C29F4    | Rabbit polyclonal | √  |     | √  |    |
| UBC9             | Abcam    | ab75854  | Rabbit monoclonal | √  | √   | √  |    |
| SENP1            | Abcam    | ab108981 | Rabbit monoclonal | √  | √   |    | √  |
| SENP2            | Abcam    | ab124724 | Rabbit monoclonal | √  | √   |    | √  |
| SENP3            | Abcam    | ab124790 | Rabbit monoclonal | √  |     |    |    |
| CBX4             | Abcam    | ab174300 | Rabbit monoclonal | √  |     |    |    |
| TRIM28           | Abcam    | ab109287 | Rabbit monoclonal | √  | √   |    | √  |
| H3K9me3          | CST      | 13969T   | Rabbit monoclonal | √  | √   | √  | √  |
| γH2AX            | Abcam    | ab81299  | Rabbit monoclonal | √  | √   | √  | √  |
| CHD4             | Abcam    | ab181370 | Rabbit monoclonal | √  |     |    | √  |
| XRCC5            | Abcam    | ab80592  | Rabbit monoclonal | √  | √   | √  | √  |
| DNA-PKcs         | Abcam    | ab32566  | Rabbit monoclonal | √  | √   |    |    |
| Phospho-DNA-PKcs | Abcam    | ab124918 | Rabbit monoclonal | √  | √   |    | √  |
| CSK21            | Abclonal | A1014    | Rabbit polyclonal | √  | √   |    | √  |
| GST              | CST      | 2625T    | Rabbit monoclonal | √  |     | √  |    |
